# Supplementary material
Source: PubMed Central journal article supplement (PMC5296228)
Supplement: JZUSB18-0109-TS1.pdf [file JZUSB18-0109-TS1.pdf]

Supplementary Materials:

## **Additive effects due to biochar and endophyte application enable soybean to enhance nutrient uptake and modulate nutritional parameters**

Muhammad WAQAS, Yoon-Ha KIM, Abdul Latif KHAN, Raheem SHAHZAD, Sajjad ASAF, Muhammad HAMAYUN, Sang-Mo KANG, Muhammad Aaqil KHAN, In-Jung LEE

**Table S1** Details of GC-MS conditions for the analysis of fatty acids

| Parameter              | GC-MS conditions                                          |
|------------------------|-----------------------------------------------------------|
| Equipment              | Agilent Model 7890A series, 5975C Mass Selective Detector |
| Column                 | DB-5MS capillary column (30 m×0.25 mm i.d.×0.25 µm)       |
| Carrier gas            | He (0.6 ml/min) with split mode (1:50)                    |
| Ion Source temperature | 180 °C                                                    |
| Oven conditions        | 50 °C→10 °C/min →200 °C (5 min)                           |
| Injector temperature   | 120°C                                                     |
| Detector temperature   | 200 °C                                                    |
| Ionizing voltage       | 70 eV                                                     |
| Scan rate              | 1.6 scan/s                                                |
| Mass range             | 30–450                                                    |
